# Supplementary material for: Molecularly Designed Ion-Imprinted Nanoparticles for Real-Time Sensing of Cu(II) Ions Using Quartz Crystal Microbalance
Source: MDPI journal article supplement (doi:10.3390/biomimetics7040191), 2022-11-05
Supplement: s1 [file s1]

## Supplementary Data 2

for

### Molecularly Designed Ion Imprinted Nanoparticles for Real-Time Sensing of Cu(II) Ions using Quartz Crystal Microbalance

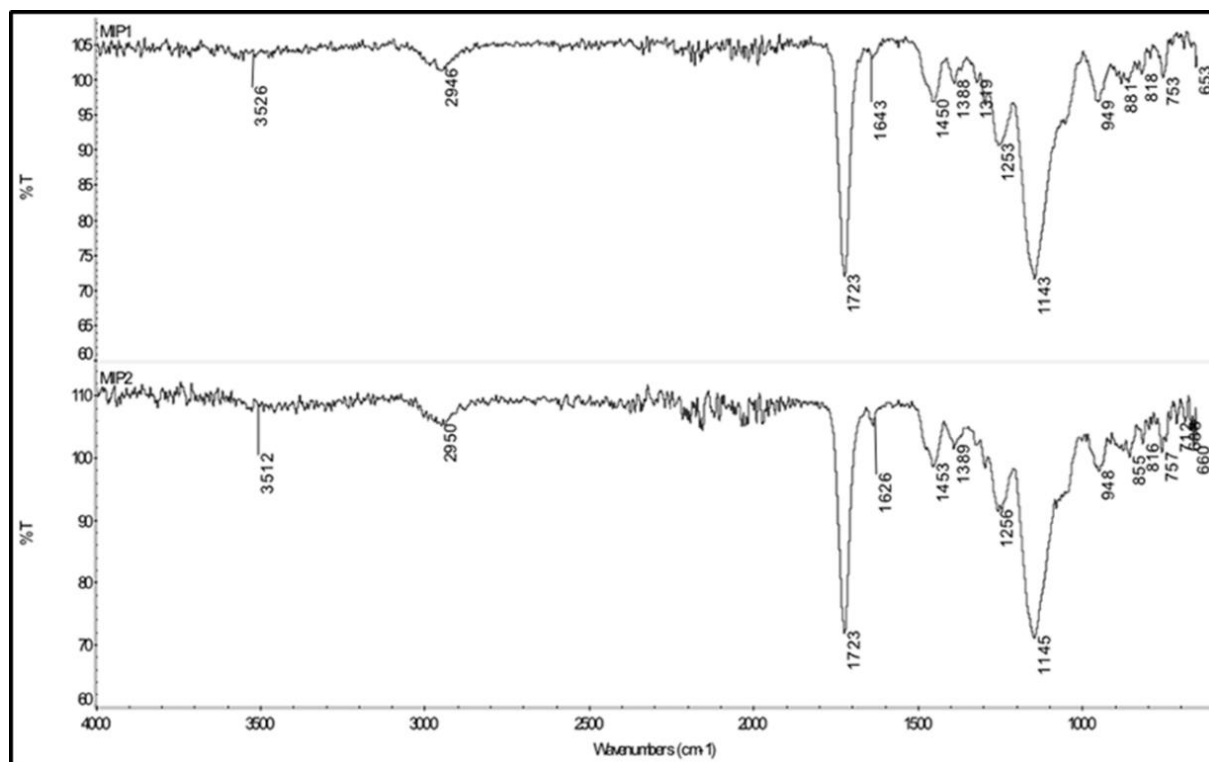

**Figure SD2-1.** FTIR spectra of Cu(II)-MIP1 (upper) and MIP2 (lower) nanoparticles.
