# Supplementary material for: Molecularly Designed Ion-Imprinted Nanoparticles for Real-Time Sensing of Cu(II) Ions Using Quartz Crystal Microbalance
Source: MDPI journal article supplement (doi:10.3390/biomimetics7040191), 2022-11-05
Supplement: s1 [file s1]

Supplementary Data 1  
for

**Molecularly Designed Ion Imprinted Nanoparticles for Real-Time Sensing of  
Cu(II) Ions using Quartz Crystal Microbalance**

**a) MAH structure**

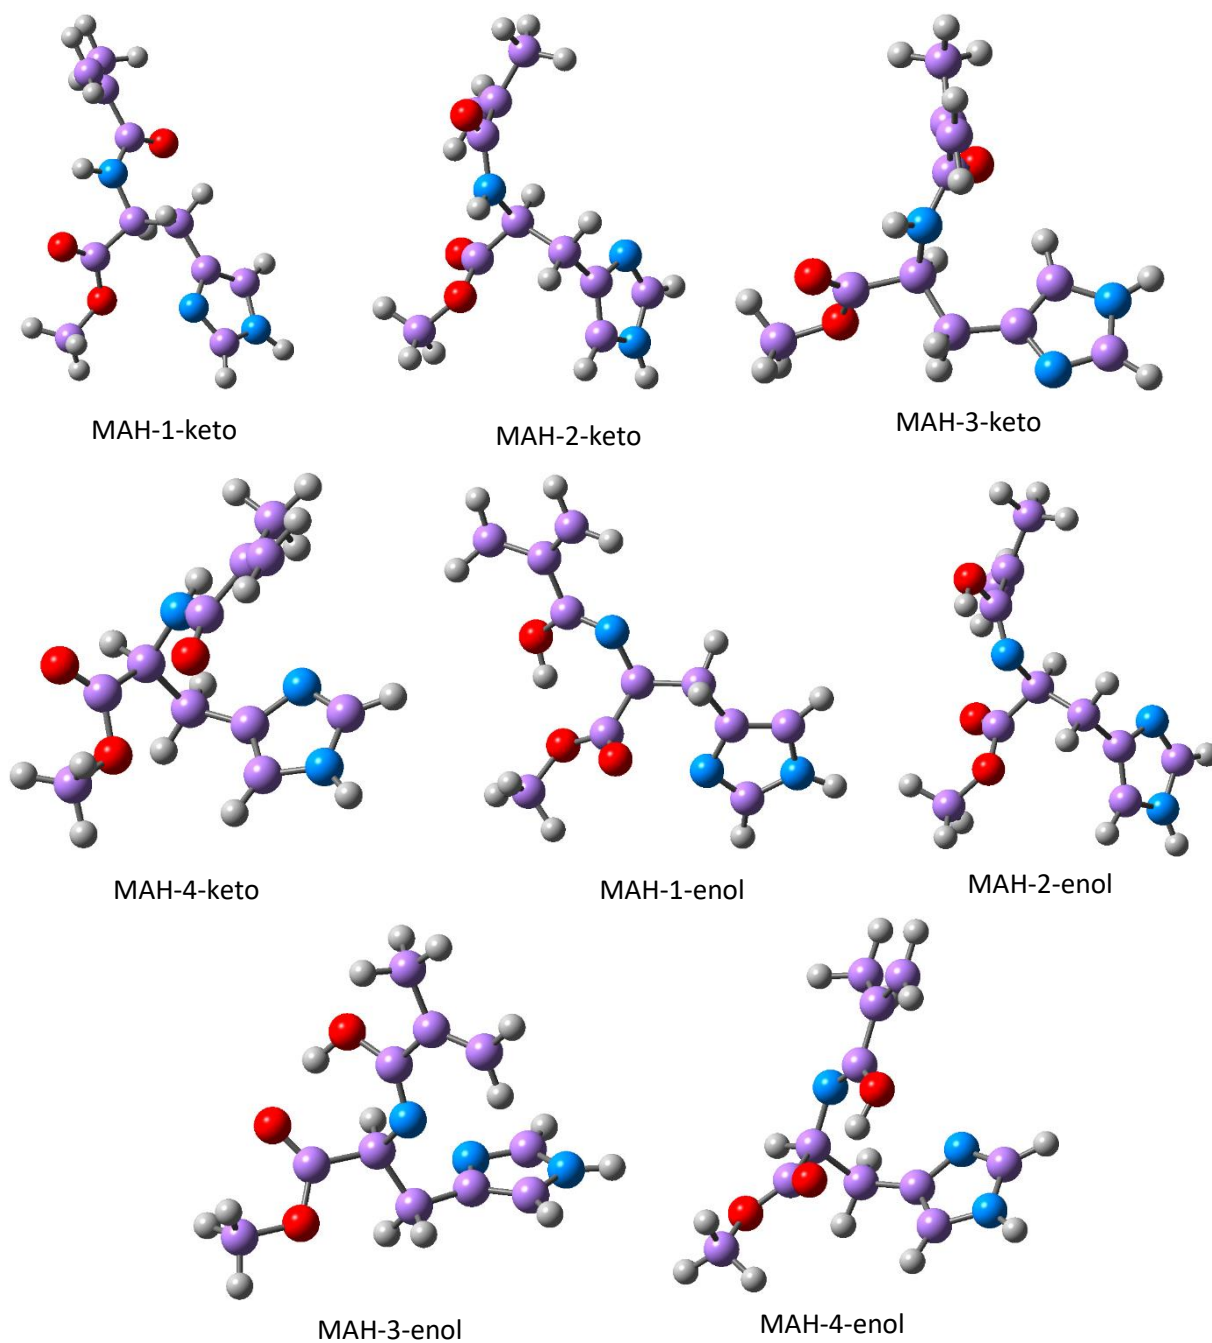

**Figure SD1-1.** The optimized geometries of the keto and enol conformers of MAH structure.  
**Table SD1-1.** The total and relative energies of keto and enol tautomers of MAH structure

| BP86/6-31G(d,p) | Total Energy (hartree) | Relative Energy (kcal/mol) |
|-----------------|------------------------|----------------------------|
| MAH-1-keto      | -818,1591729           | 0,63                       |
| MAH-2-keto      | -818.1500523           | 6.35                       |

|            |              |       |
|------------|--------------|-------|
| MAH-3-keto | -818.1601783 | 0.00  |
| MAH-4-keto | -818.1483918 | 7.40  |
| MAH-1-enol | -818.1344719 | 16.13 |
| MAH-2-enol | -818.1315501 | 17.96 |
| MAH-3-enol | -818.1388452 | 13.39 |
| MAH-4-enol | -818.1369506 | 14.58 |

***b) Cu(II)-MAH aqua complexes***

**Table SD1-2.** The total, binding and relative energies of four-fold structures of Cu(II)-MAH complexes

| Four-fold structures   | Total Energy<br>(hartree) | BE         | relative E kcal/mol |
|------------------------|---------------------------|------------|---------------------|
| MAH-Cu-2N-2aq-keto     | -1166.756902              | -0.6228299 | 20.71               |
| MAH-Cu-2N-2aq-enol     | -1166.760178              | -0.6474388 | 5.26                |
| MAH-Cu-NO-2aq-enol     | -1166.755198              | -0.6424590 | 8.39                |
| MAH-Cu-OO-2aq-keto     | -1166.769448              | -0.6353752 | 12.83               |
| MAH-Cu-OO-2aq-enol     | -1166.725683              | -0.6129438 | 26.91               |
| MAH-Cu-RingN-3aq-keto  | -1243.205197              | -0.6515438 | 2.69                |
| MAH-Cu-RingN-3aq-enol  | -1243.188149              | -0.6558289 | 0.00                |
| MAH-Cu-RingNO-2aq-keto | -1166.772855              | -0.6387827 | 10.70               |
| MAH-Cu-ONO-aq-enol     | -1090.296100              | -0.6029413 | 33.19               |
| Cu(II)                 | -195.1347327              |            |                     |
| aqua                   | -76.4195807               |            |                     |

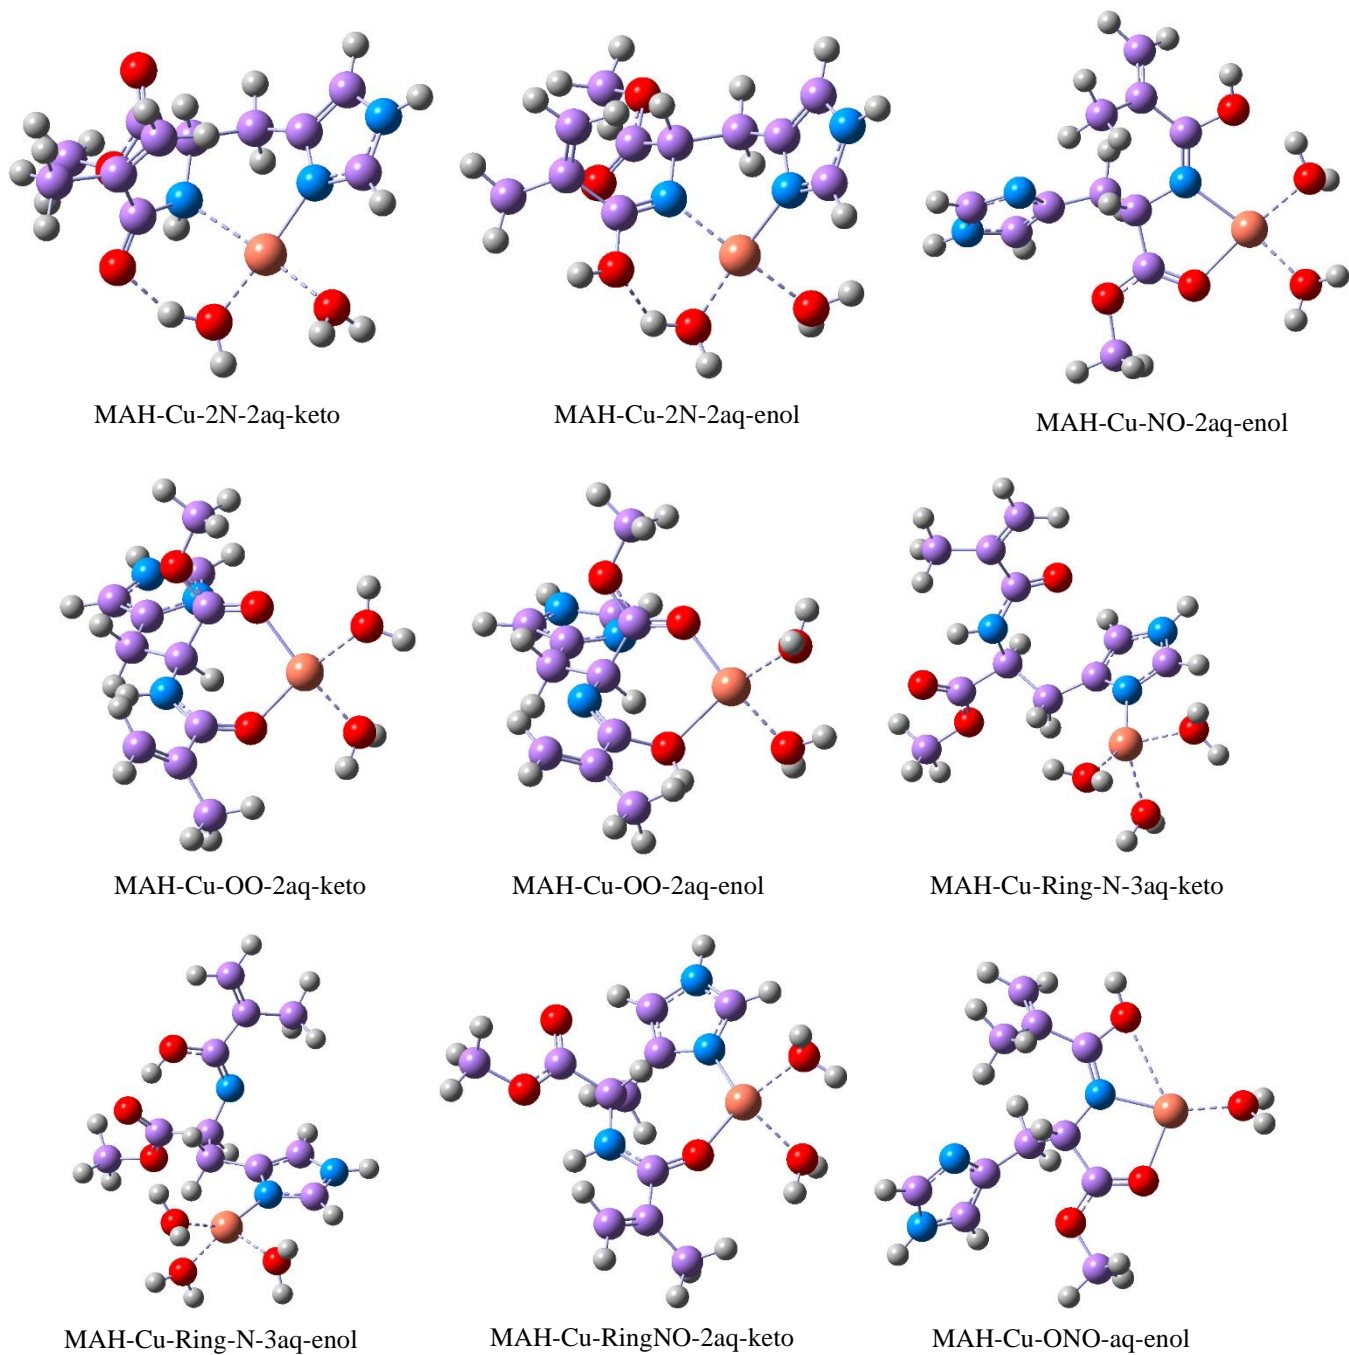

**Figure SD1-2.** The optimized geometries of four-fold structures of Cu(II)-MAH complexes

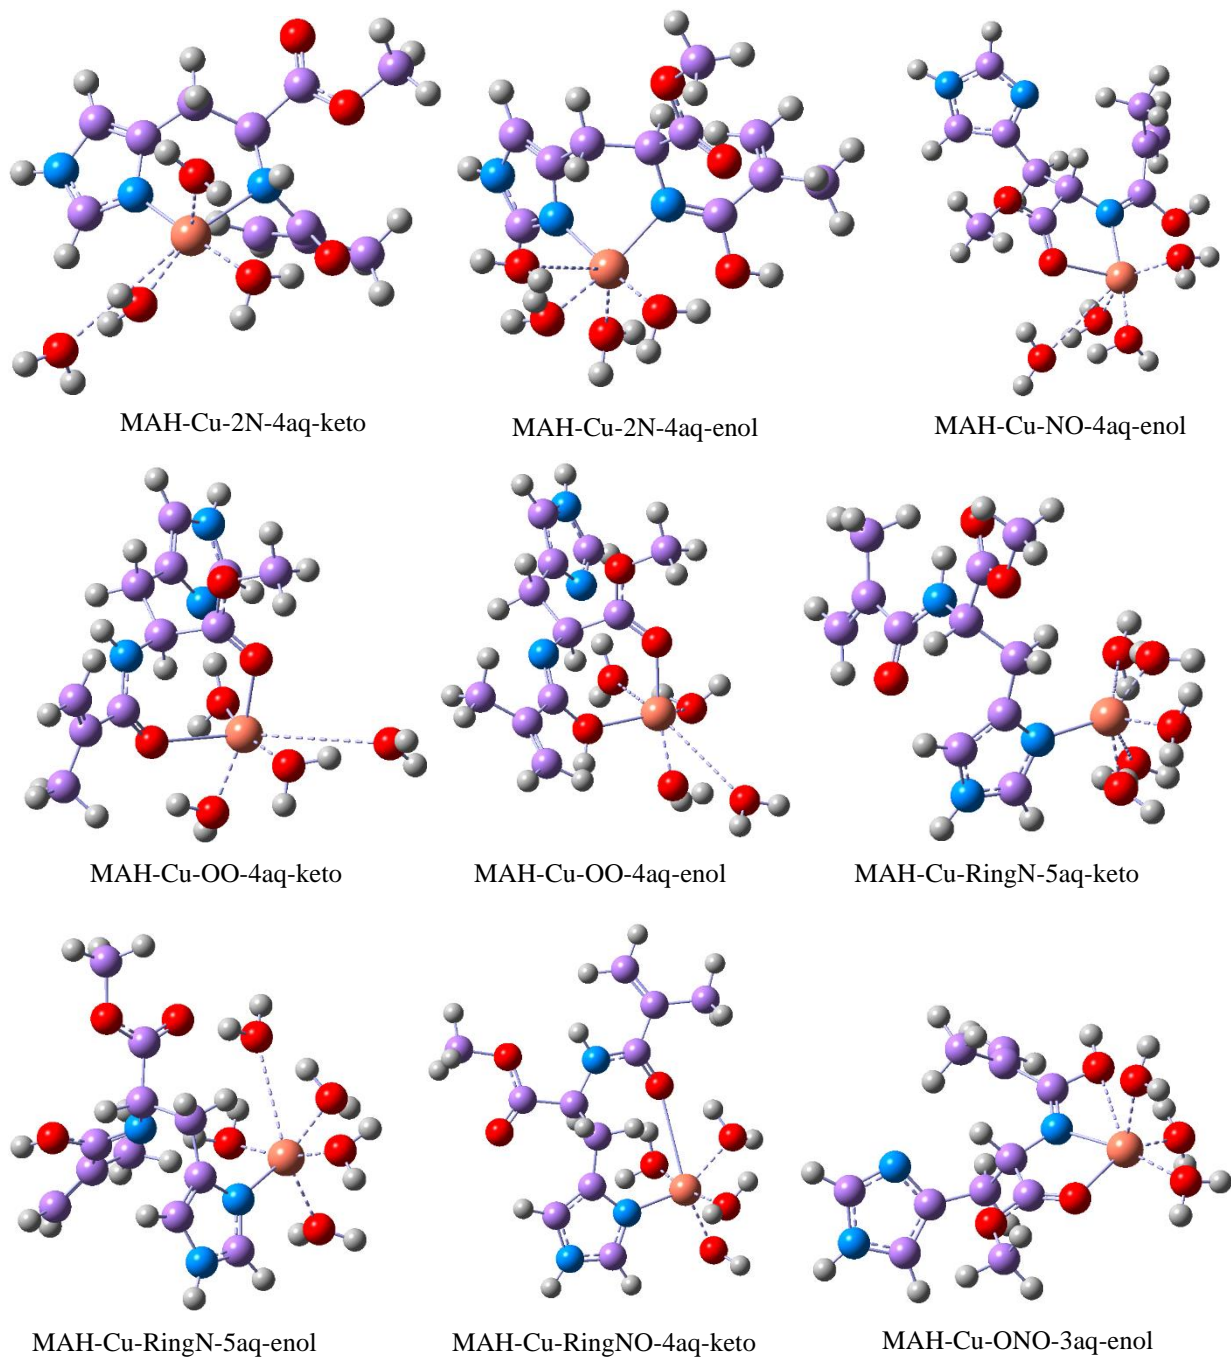

**Figure SD1-3.** The optimized geometries of six-fold structures of Cu(II)-MAH complexes

**Table SD1-3.** The total, binding and relative energies of six-fold structures of Cu(II)-MAH complexes

| Six-fold structures    | Total Energy | BE         | relative E kcal/mol |
|------------------------|--------------|------------|---------------------|
| MAH-Cu-2N-4aq-keto     | -1319.666417 | -0.6931828 | 35.59               |
| MAH-Cu-2N-4aq-enol     | -1319.66494  | -0.7130388 | 23.13               |
| MAH-Cu-NO-4aq-enol     | -1319.65187  | -0.6999693 | 31.34               |
| MAH-Cu-OO-4aq-keto     | -1319.68437  | -0.711136  | 24.33               |
| MAH-Cu-OO-4aq-enol     | -1319.645785 | -0.6938844 | 35.15               |
| MAH-Cu-RingN-5aq-keto  | -1396.112024 | -0.7192094 | 19.26               |
| MAH-Cu-RingN-5aq-enol  | -1396.121387 | -0.7499056 | 0.00                |
| MAH-Cu-RingNO-4aq-keto | -1319.676061 | -0.7028273 | 29.54               |
| MAH-Cu-ONO-3aq-enol    | -1243.203379 | -0.6710592 | 49.48               |

c) *Cu(II)-(MAH)<sub>2</sub> aqua complexes*

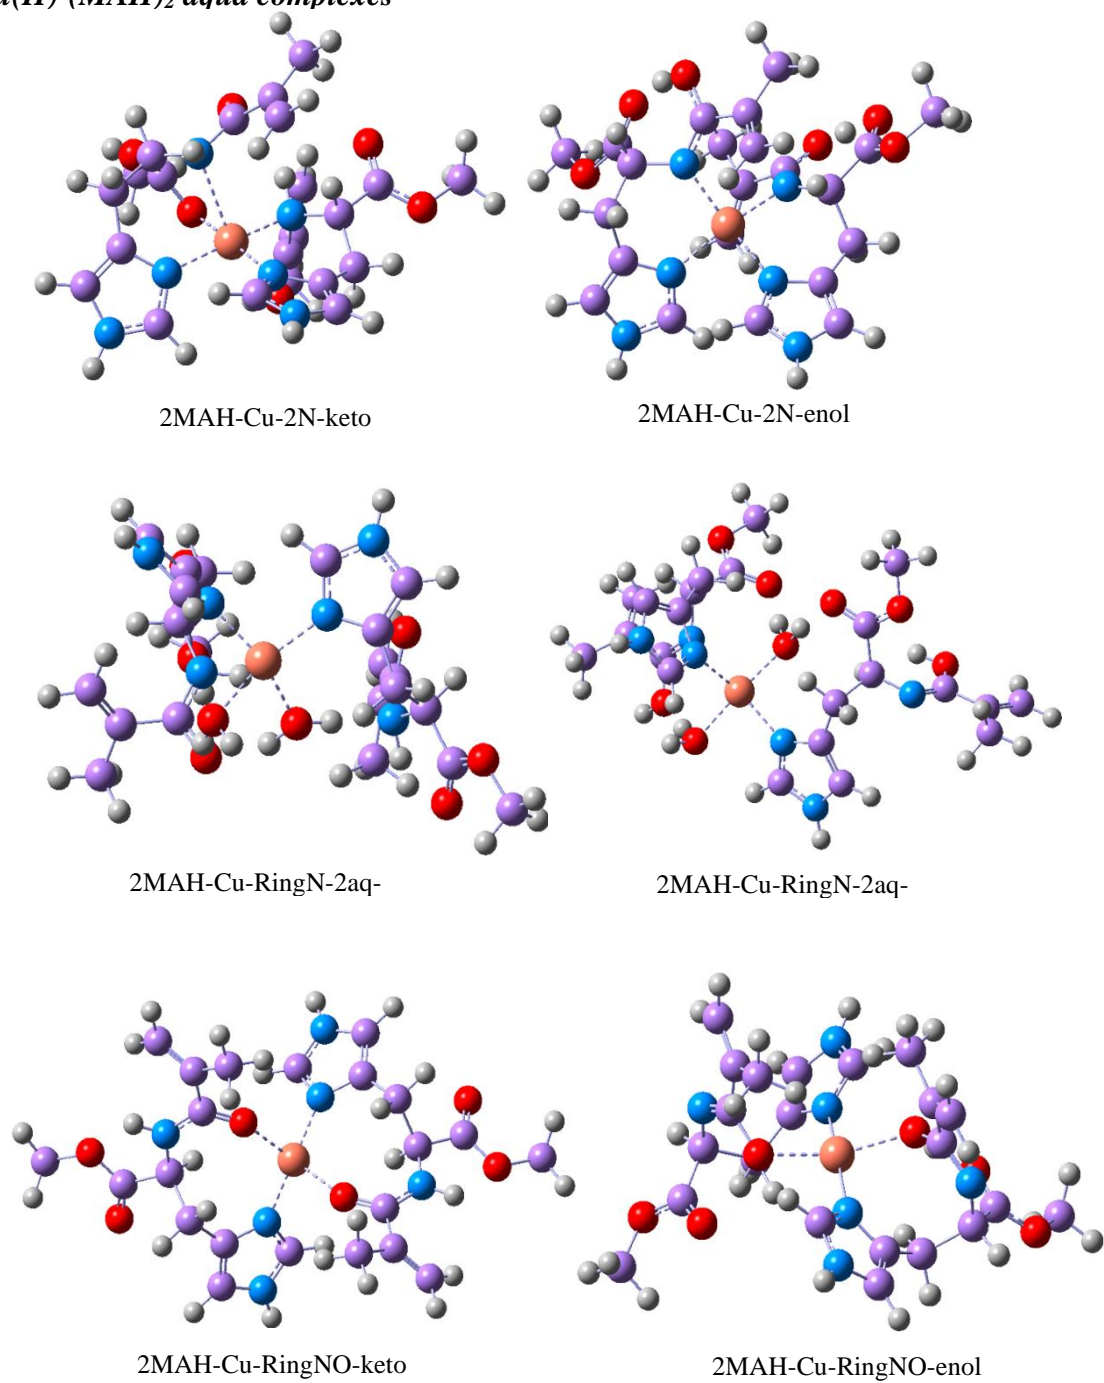

**Figure SD1-4.** The optimized geometries of four-fold structures of Cu(II)-(MAH)<sub>2</sub> complexes

**Table SD1-4.** The total, binding and relative energies of four-fold structures of Cu(II)-(MAH)<sub>2</sub> complexes

| Four-fold structures   | Total Energy<br>(hartree) | Binding Energy<br>hartree | Relative Energy<br>kcal/mol |
|------------------------|---------------------------|---------------------------|-----------------------------|
| 2MAH-Cu-2N-keto        | -1832.112041              | -0.6569512                | 34.18                       |
| 2MAH-Cu-2N-enol        | -1832.105943              | -0.6935200                | 11.23                       |
| 2MAH-Cu-RingN-2aq-keto | -1984.988207              | -0.6939566                | 10.96                       |
| 2MAH-Cu-RingN-2aq-enol | -1984.963007              | -0.7114229                | 0.00                        |
| 2MAH-Cu-RingNO-keto    | -1832.121363              | -0.6662735                | 28.33                       |
| 2MAH-Cu-RingNO-enol    | -1832.069192              | -0.6567690                | 34.30                       |

**Table SD1-5.** The total, binding and relative energies of four-fold structures of Cu(II)-(MAH)<sub>2</sub> complexes

| Six-fold structures     | Total Energy<br>(hartree) | Binding Energy<br>hartree | Relative Energy<br>kcal/mol |
|-------------------------|---------------------------|---------------------------|-----------------------------|
| 2MAH-Cu-2N-2aq-keto     | -1984.997084              | -0.7028335                | 39.34                       |
| 2MAH-Cu-2N-2aq-enol     | -1984.977263              | -0.7256784                | 25.00                       |
| 2MAH-Cu-RingN-4aq-keto  | -2137.89126               | -0.7578476                | 4.82                        |
| 2MAH-Cu-RingN-4aq-enol  | -2137.856273              | -0.7655268                | 0.00                        |
| 2MAH-Cu-RingNO-2aq-keto | -1985.015234              | -0.7209830                | 27.95                       |
| 2MAH-Cu-RingNO-2aq-enol | -1984.952924              | -0.7013391                | 40.28                       |



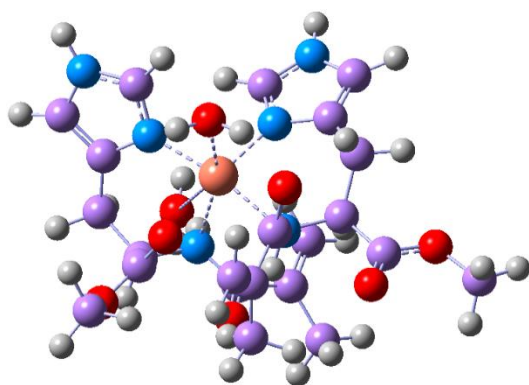

2MAH-Cu-2N-2aq-keto

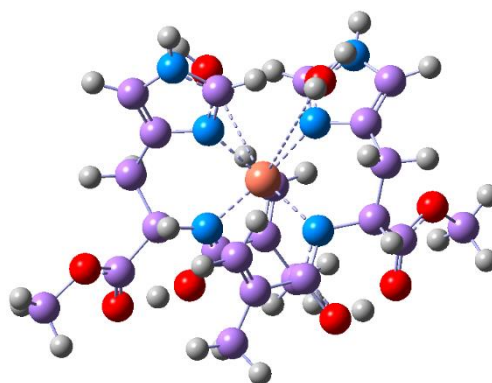

2MAH-Cu-2N-2aq-enol

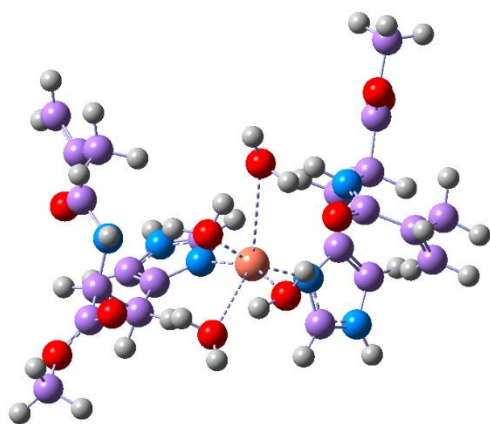

2MAH-Cu-RingN-4aq-keto

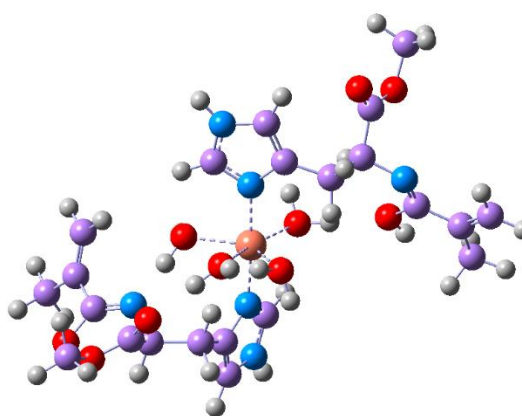

2MAH-Cu-RingN-4aq-enol

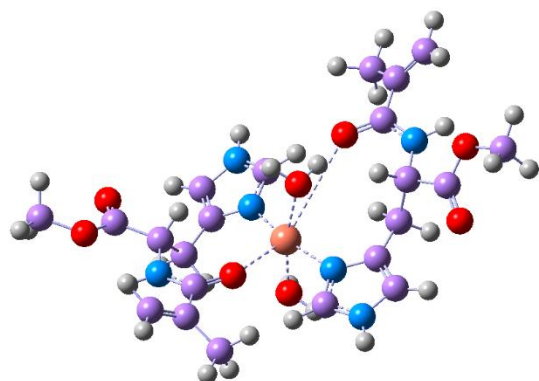

2MAH-Cu-RingNO-2aq-keto

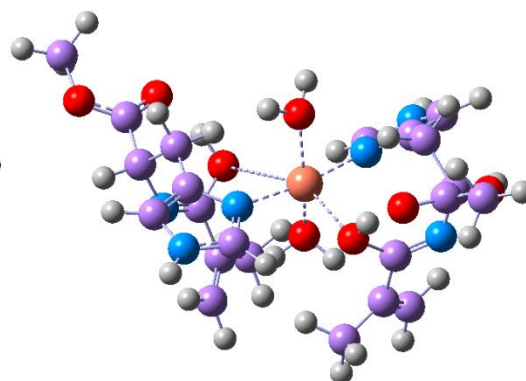

2MAH-Cu-RingNO-2aq-enol

**Figure SD1-5.** The optimized geometries of six-fold structures of Cu(II)-(MAH)<sub>2</sub> complexes.
